# Supplementary material for: The canonical smooth muscle cell marker TAGLN is present in endothelial cells and is involved in angiogenesis
Source: Oxford University Press journal article supplement (doi:10.1242/jcs.254920), 2021-07-07
Supplement: jcs254920supp.pdf [file jcs254920supp.pdf]

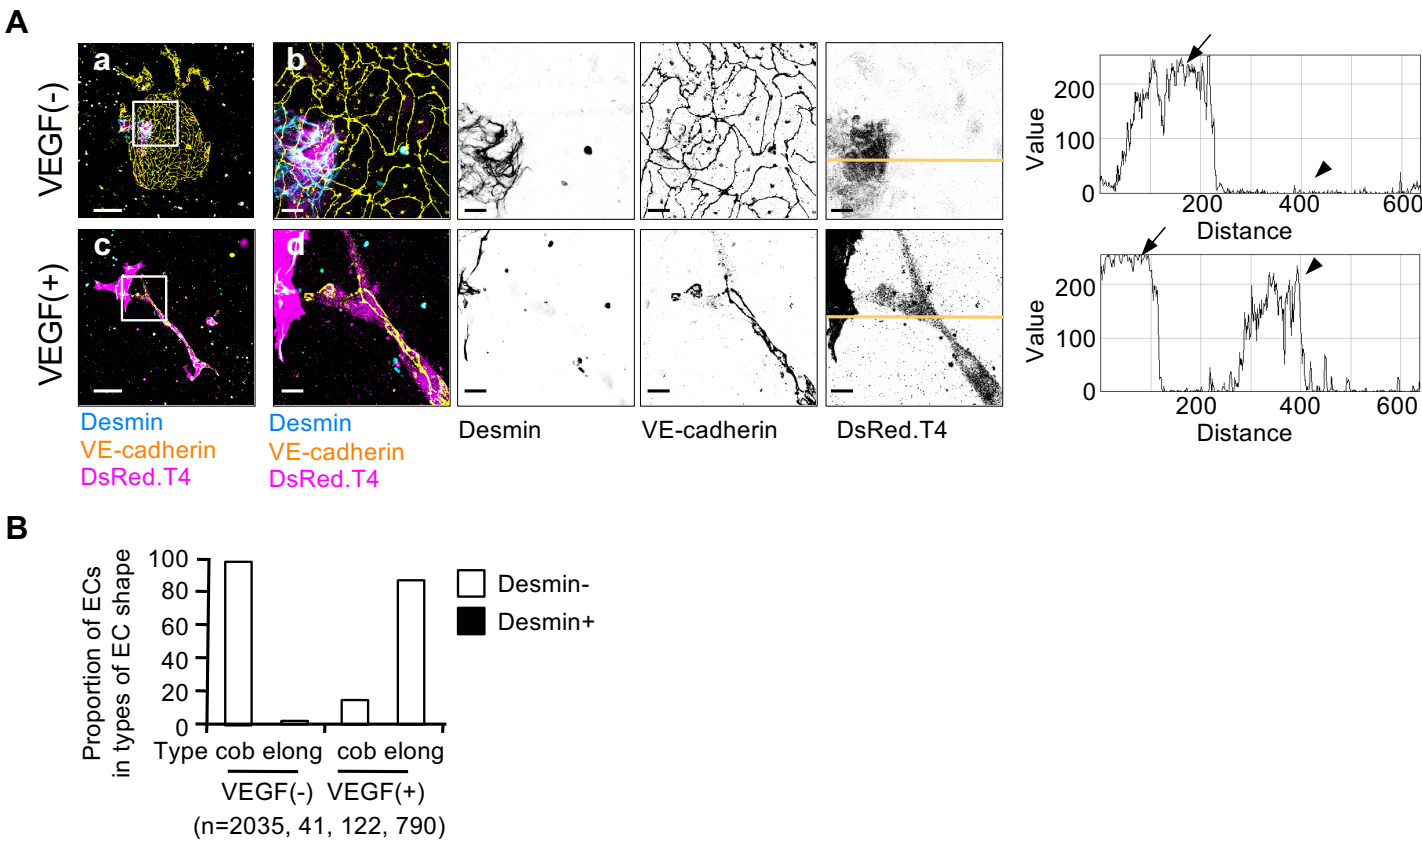

**Figure S1. The *Tagln* promoter is activated in ECs stimulated with VEGF**

KDR<sup>+</sup> cells induced from F10-EGFP/Tagln-DsRed.T4 ESCs were cultured on an OP9 cell layer for four days with or without addition of VEGF (10 ng/ml). We obtained z-stack confocal images of cultures after fixation and immunostaining. (A) Immunostaining of desmin (cyan), VE-cadherin (yellow) and DsRed.T4 (magenta). Multiple or individual channels are shown as merged or black-white inverted images, respectively. Panels (b) and (d) show higher magnifications of the boxed area in panels (a) and (c), respectively. Scale bars indicate 100  $\mu$ m (a and c) or 20  $\mu$ m (b and d). The right panels show the fluorescence intensity profiles along each yellow line in the DsRed.T4 image. Arrows and arrowheads indicate the peaks of SMCs and ECs, respectively. Similar results were obtained in three independent experiments using two clones. (B) ECs were categorized into the two types of EC shape: cobblestone (type cob) and elongated (type elong), and scored as either Desmin<sup>+</sup> or Desmin<sup>-</sup>. The proportion of Desmin<sup>-</sup> and Desmin<sup>+</sup> ECs with the two types of EC shape are shown. The total number of ECs of each shape for the two VEGF treatments, observed across three independent experiments using different clones, is indicated in the brackets.

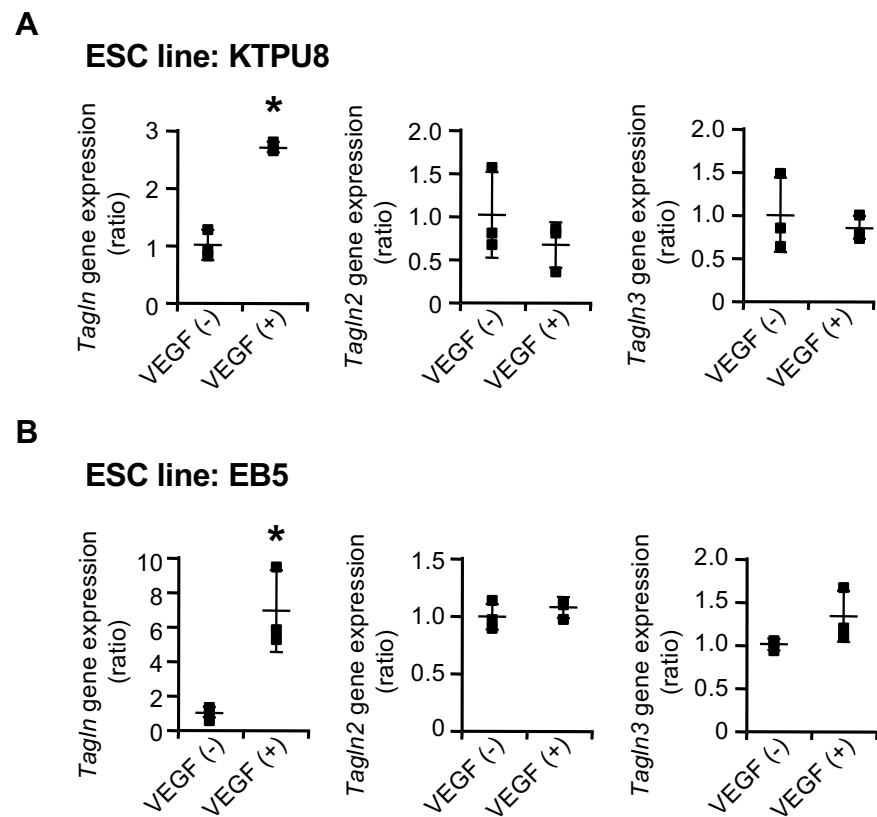

**Figure S2. Expressions of *Tagln* isoforms in ECs derived from ESCs**

KDR<sup>+</sup> cells induced from two mouse ESC lines, KTPU8 and EB5, were cultured on an OP9 cell layer with or without the addition of VEGF (10 ng/ml). After four days, CD45<sup>-</sup> VE-cadherin<sup>+</sup> CD31<sup>+</sup> KDR<sup>+</sup> ECs were purified. (A and B) Expressions of the *Tagln*, *Tagln2* and *Tagln3* genes in ECs derived from KTPU8 (A) and EB5 (B) were quantified using real-time quantitative PCR. Expression levels were normalized to *B2m*. Data is presented as a ratio relative to the VEGF (-) control (mean ± SD, n = 3 from three independent experiments). The Data were analyzed using F-test, followed by a two-tailed t-test (\* *p* < 0.05).

A

***TAGLN* (WT)**

GGATCATAGTGCAGTGTGGCCCTGATGTGGGCC**CGCC**CAGACCGTGGGCGCTT**GGG**CTTCCAGGTCTGGC

***SM22* (8-bp deletion)**

GGATCATAGTGCAGTGTGGCCCTGATGTGGGCC**CGCC**CAGACCGT----- **GGG**CTTCCAGGTCTGGC

***TAGLN2* (WT)**

CAGATCCTGATCCAGTGGATCACCACCCAGTG**CCG**AAAGGATGTGG**CGCC**GGCC**CC**AGCCTGGACGCGAG

***Tagln2* (32-bp deletion)**

CAGATCCTGATCCAG----- **CCGGCCCC**AGCCTGGACGCGAG

***TAGLN3* (WT)**

GATGCGGACCTGGAGAACAAGCTGGTGGACTG**GATCATCCTGCAGTGC****CGCC****AGG**ACATAGAGCACCCG

***Tagln3* (10-bp deletion)**

GATGCGGACCTGGAGAACAAGCTGGTGGACTG**GATCATCCTGCAGTGC**----- AGAGCACCCG

B

***TAGLN* (8-bp deletion)**

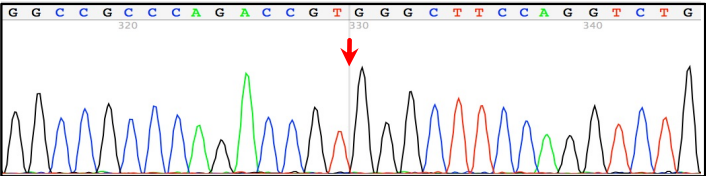

***TAGLN2* (32-bp deletion)**

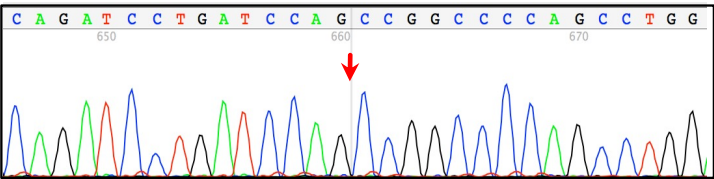

***TAGLN3* (10-bp deletion)**

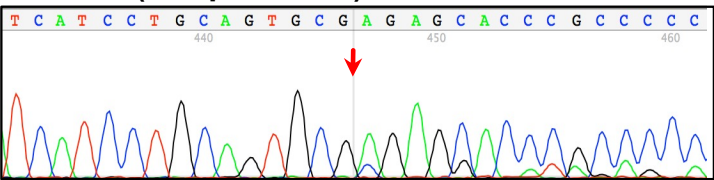

C

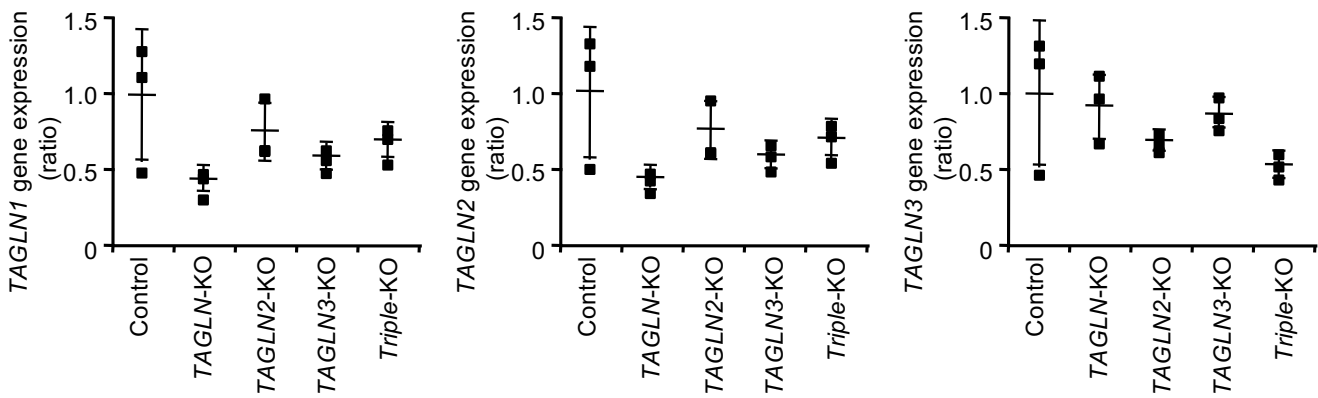

**Figure S3. CRISPR/Cas9-mediated mutagenesis of the *TAGLN* isoforms**

(A) Sequences of wild type (WT) and the representative mutations at target sites of genome editing in *TAGLN*, *TAGLN2* and *TAGLN3* genes. The target sequence and the PAM region are indicated in blue and red, respectively. Dashes (-) indicate deletions. (B) Nucleotide peaks of the representative mutated sequence at target sites of *TAGLN*, *TAGLN2* and *TAGLN3* genes. Red arrows indicate the location of mutations. (C) HUVECs were genetically edited in *TAGLN*, *TAGLN2* and *TAGLN3* genes with CRISPR/Cas9 system, which indicated as follows: *TAGLN*, *TAGLN2*, *TAGLN3* single-KO (KO), *TAGLN* isoforms triple-KO (triple-KO). The mRNA expression level of *TAGLN* isoforms was determined using real-time quantitative PCR analysis. Data were normalized to *B2M*, and are presented as fold change relative to the control (mean  $\pm$  SD, n = 3 from three independent experiments). Data were analyzed using Tukey's test. No significant difference was found. These primers used for *TAGLN* isoforms target the downstream regions of CRISPR targeting sites in each gene. The amplification of fragments was not affected by each gene knockout.

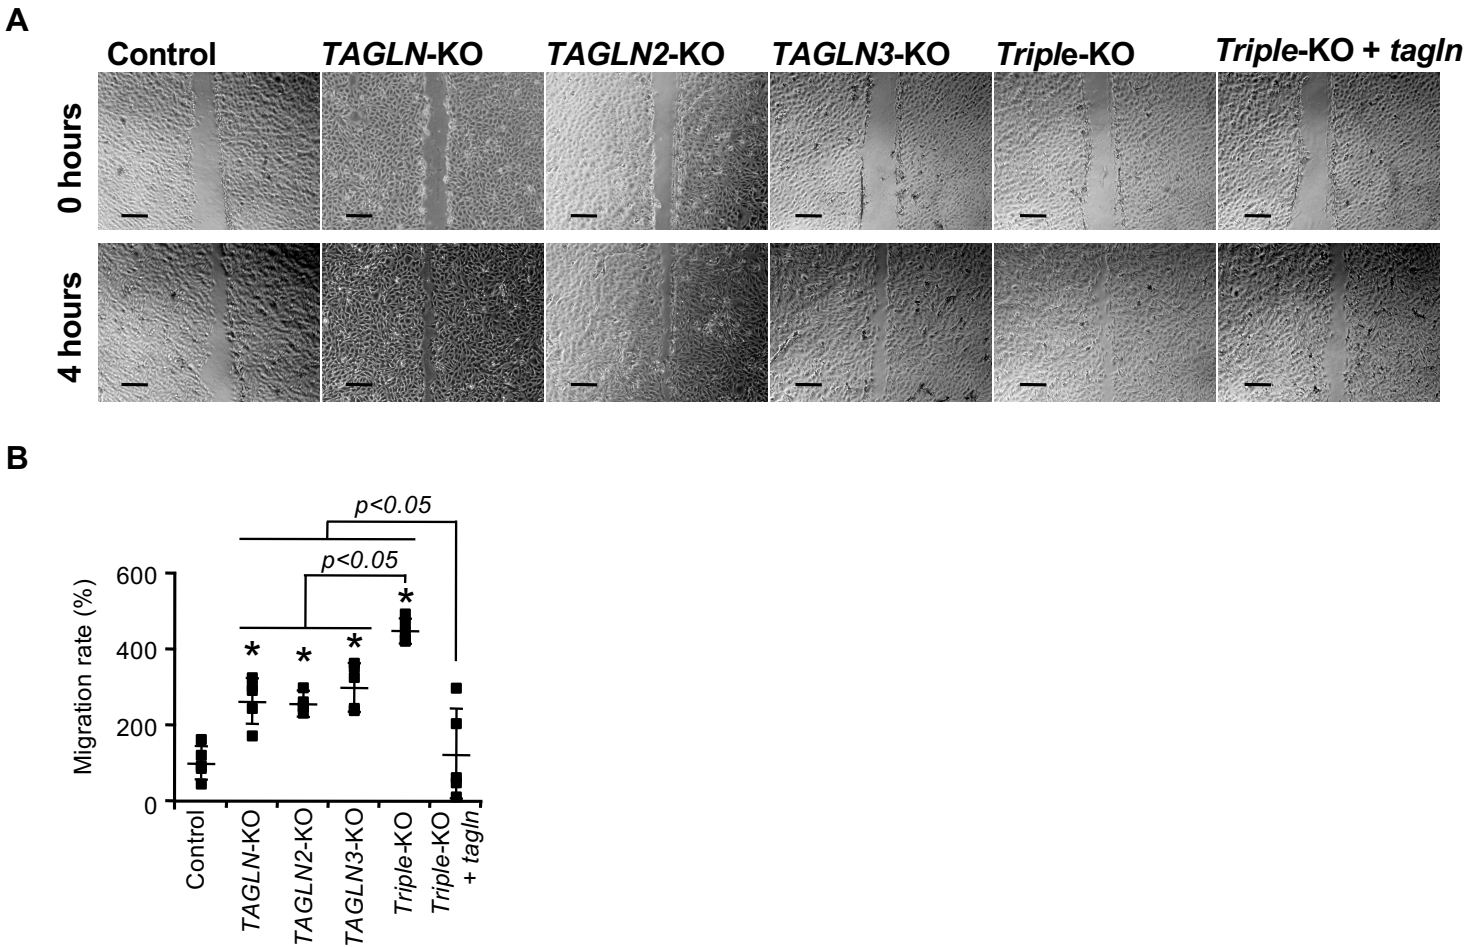

**Figure S4. Single and triple-knockout of *TAGLN* isoforms promotes migration of ECs.**

HUVECs were genetically edited in *TAGLN*, *TAGLN2* and *TAGLN3* genes with CRISPR/Cas9 system, and applied to rescue expression of zebrafish *tagln*, which indicated as follows: *TAGLN*, *TAGLN2*, *TAGLN3* single-KO (KO), *TAGLN* isoforms triple-KO (triple-KO), and *tagln*-expression-rescued triple-KO (triple-KO + *tagln*). The cell monolayers were scratched using a universal cell scraper. (A) Phase-contrast images at 0 and 4 hours after scratch generation. Scale bars indicate 200  $\mu$ m. Similar results were obtained in five independent experiments. (B) The migration rate are presented as the mean  $\pm$  SD (n = 5 from five independent experiments). Data were analyzed using Tukey's test (\*  $p$  < 0.05 compared with the control).



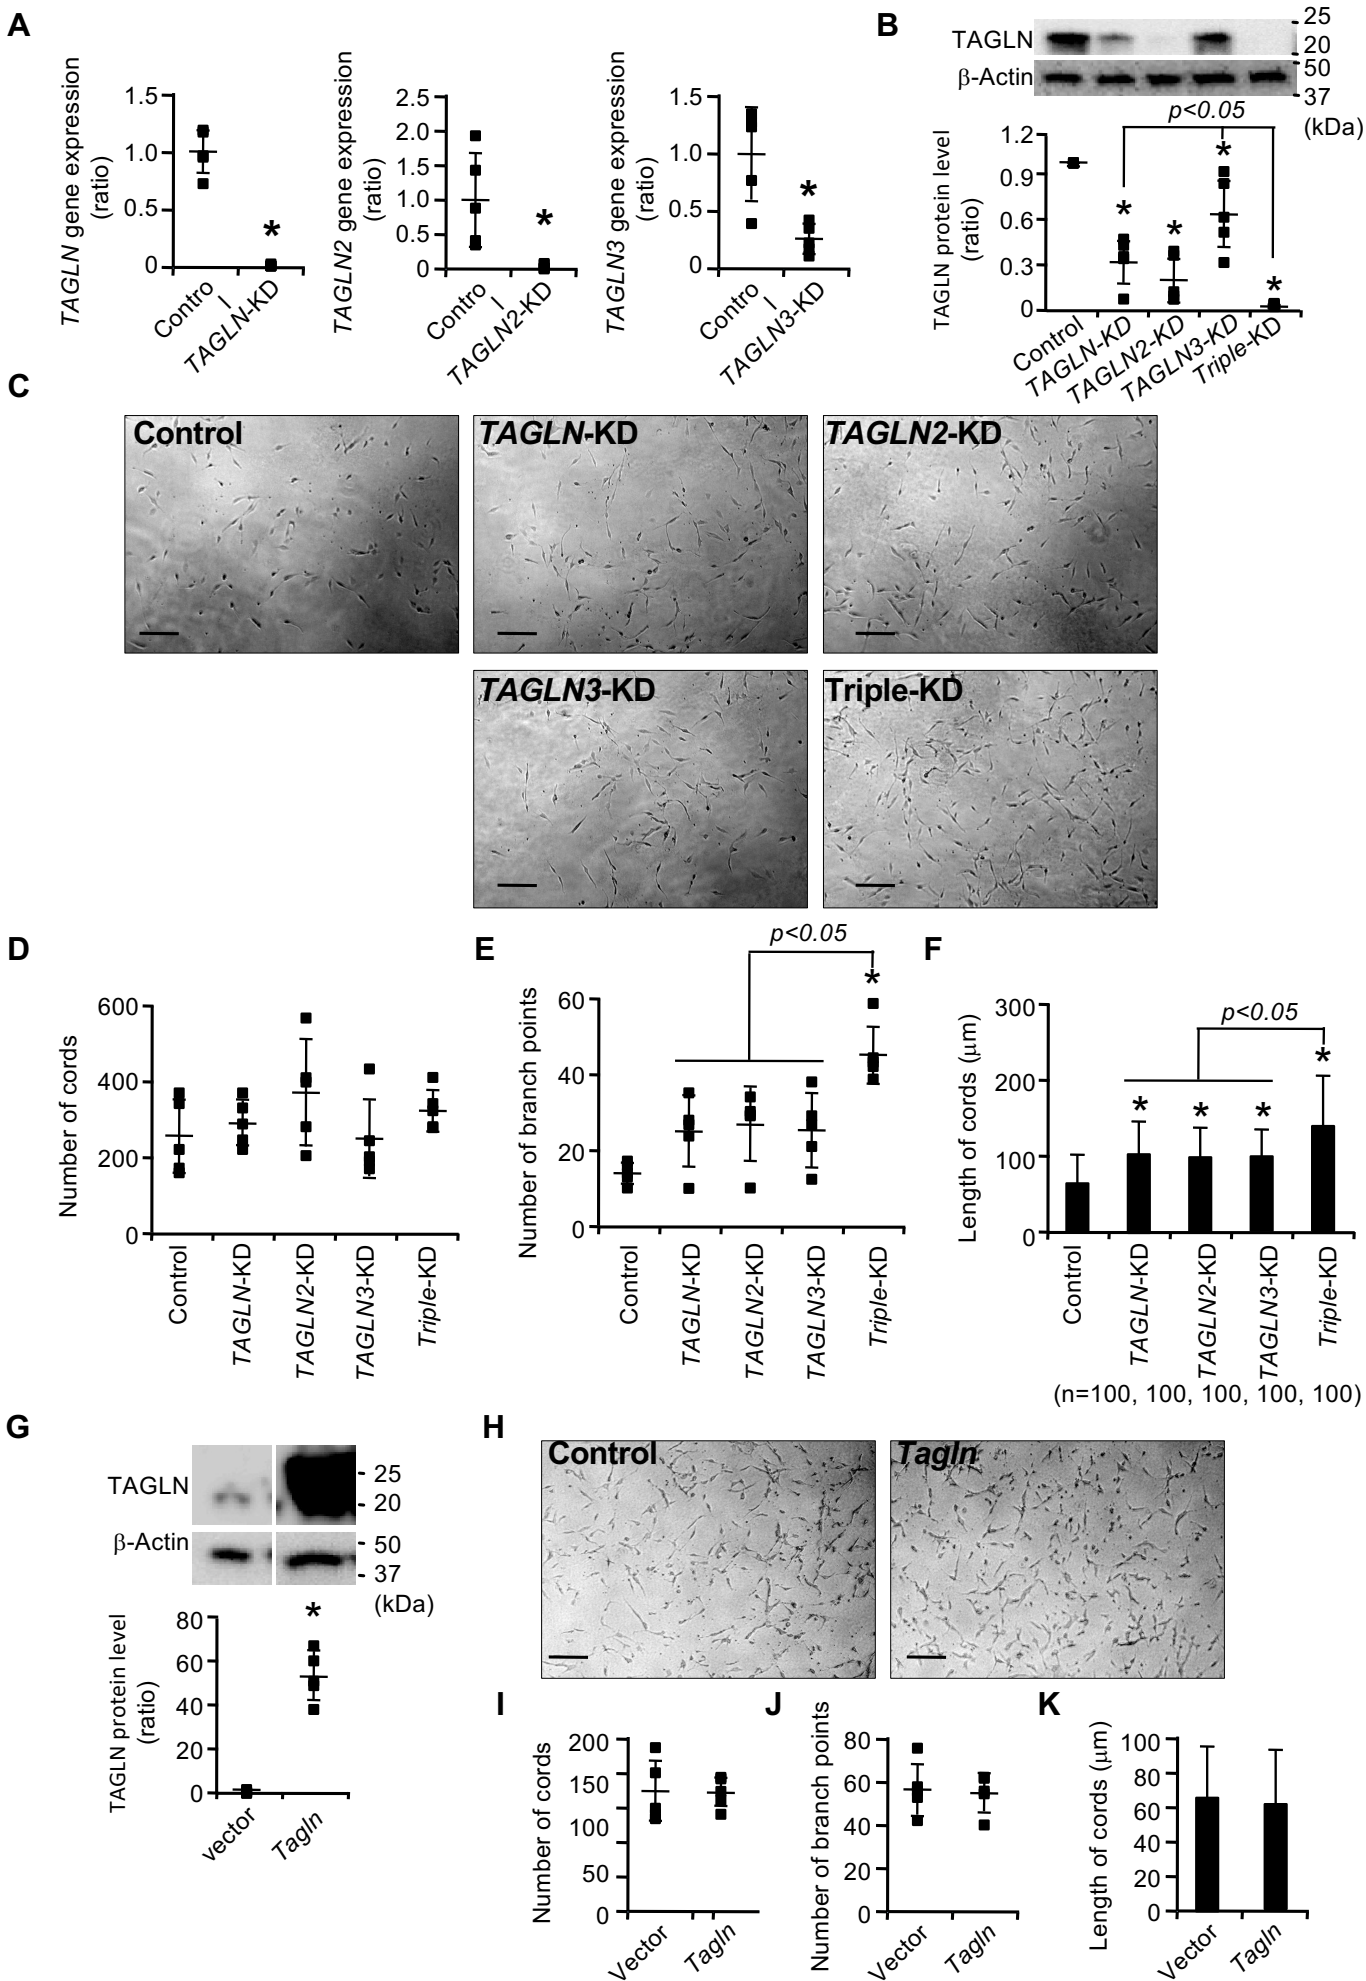

**Figure S5. Single and triple-knockdown of *TAGLN* isoforms causes excessive cord-like structure formation**

(A-F) HUVECs were transfected with a single siRNA targeting *TAGLN*, *TAGLN2* or *TAGLN3* (44 pg), a mixture of *TAGLN* isoforms siRNAs (44 pg each, total 132 pg), or control siRNA (132 pg), which indicated as follows: *TAGLN*, *TAGLN2*, *TAGLN3* single-knockdown (KD), and *TAGLN* isoforms triple-KD (triple-KD). (A) The mRNA expression level of *TAGLN* isoforms was determined using real-time quantitative PCR analysis. Data were normalized to *B2M*, and are presented as fold change relative to the control (mean  $\pm$  SD,  $n = 5$  from five independent experiments). The data were analyzed using F-test, followed by a two-tailed t-test (\*  $p < 0.05$ ). (B) Western blot analysis with antibodies against the *TAGLN* protein (ab14106, Abcam). (Upper) Western blot images.  $\beta$ -Actin protein was used as an internal control. Similar results were obtained in five independent experiments. (Lower) Expression levels were normalized to  $\beta$ -Actin. Data are presented as a ratio relative to the control group (mean  $\pm$  SD,  $n = 5$  from five independent experiments). The data were analyzed using Tukey's test (\*  $p < 0.05$  compared with the control group). (C-F) siRNA-transfected HUVECs were grown in 3D sandwich culture in the presence of VEGF (10 ng/ml) for one day. (C) Phase-contrast images. Scale bars indicate 200  $\mu$ m. Similar results were obtained in three independent experiments. (D and E) The number of cord-like structure (D) and branch points (E) per field is presented as the mean  $\pm$  SD ( $n = 5$  fields per group). The data were analyzed using Tukey's test (\*  $p < 0.05$  compared with the control). (F) The length of the cord-like structure is presented as the mean  $\pm$  SD. The total number of cords examined is indicated in the brackets. The data were analyzed using Tukey's test (\*  $p < 0.05$  compared with the control). (G-K) HUVECs were transfected with pCAG-Ipuro expressing mouse *Tagln* or pCAG-Ipuro vector. (G) Western blot analysis with antibodies against the *TAGLN* protein (ab14106, Abcam). (Upper) Western blot images.  $\beta$ -Actin protein was used as an internal control. Similar results were obtained in five independent experiments. (Lower) Expression levels were normalized to  $\beta$ -Actin. Data are presented as a ratio relative to the control group (mean  $\pm$  SD,  $n = 5$  from five independent experiments). The data were analyzed using F-test, followed by a two-tailed t-test (\*  $p < 0.05$ ). (H-K) *Tagln*-transfected HUVECs were grown in 3D sandwich culture in the presence of VEGF (10 ng/ml) for one day. (H) Phase-contrast images. Scale bars indicate 200  $\mu$ m. Similar results were obtained in three independent experiments. (I and J) The number of cord-like structure (I) and branch points (J) per field is presented as the mean  $\pm$  SD ( $n = 5$  fields per group). The data were analyzed using F-test, followed by a two-tailed t-test. (K) The length of the cord-like structure is presented as the mean  $\pm$  SD. The total number of cords examined is indicated in the brackets. The data were analyzed using F-test, followed by a two-tailed t-test.

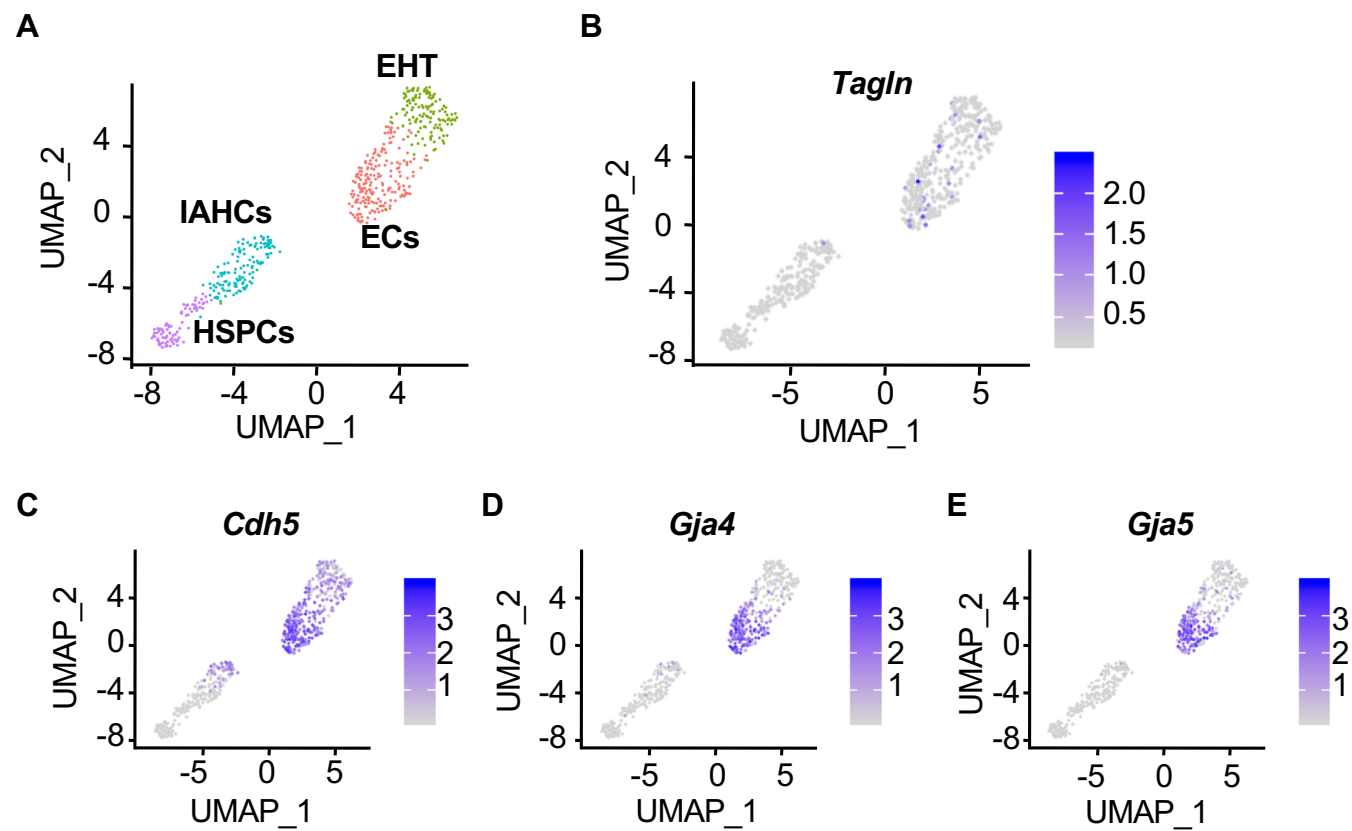

**Figure S6. *Tagln*-expressing cells are detected in the EC cluster from embryonic aortas**

Analysis of a single cell RNA-seq dataset of E10.5 mouse embryonic aortas. (A) Canonical cell markers were used to label clusters by cell identity based on the previous report (Baron et al., 2018) as represented in the UMAP plot. ECs: endothelial cells, EHT: endothelial-to-hematopoietic transition, IAHCs: intra-aortic hematopoietic clusters, HSPCs: hematopoietic stem and progenitor cells. (B, C, D and E) The feature plot shows the expression of *Tagln* (B) and endothelial cell markers, *Cdh5* (C), *Gja4* (D) and *Gja5* (E).

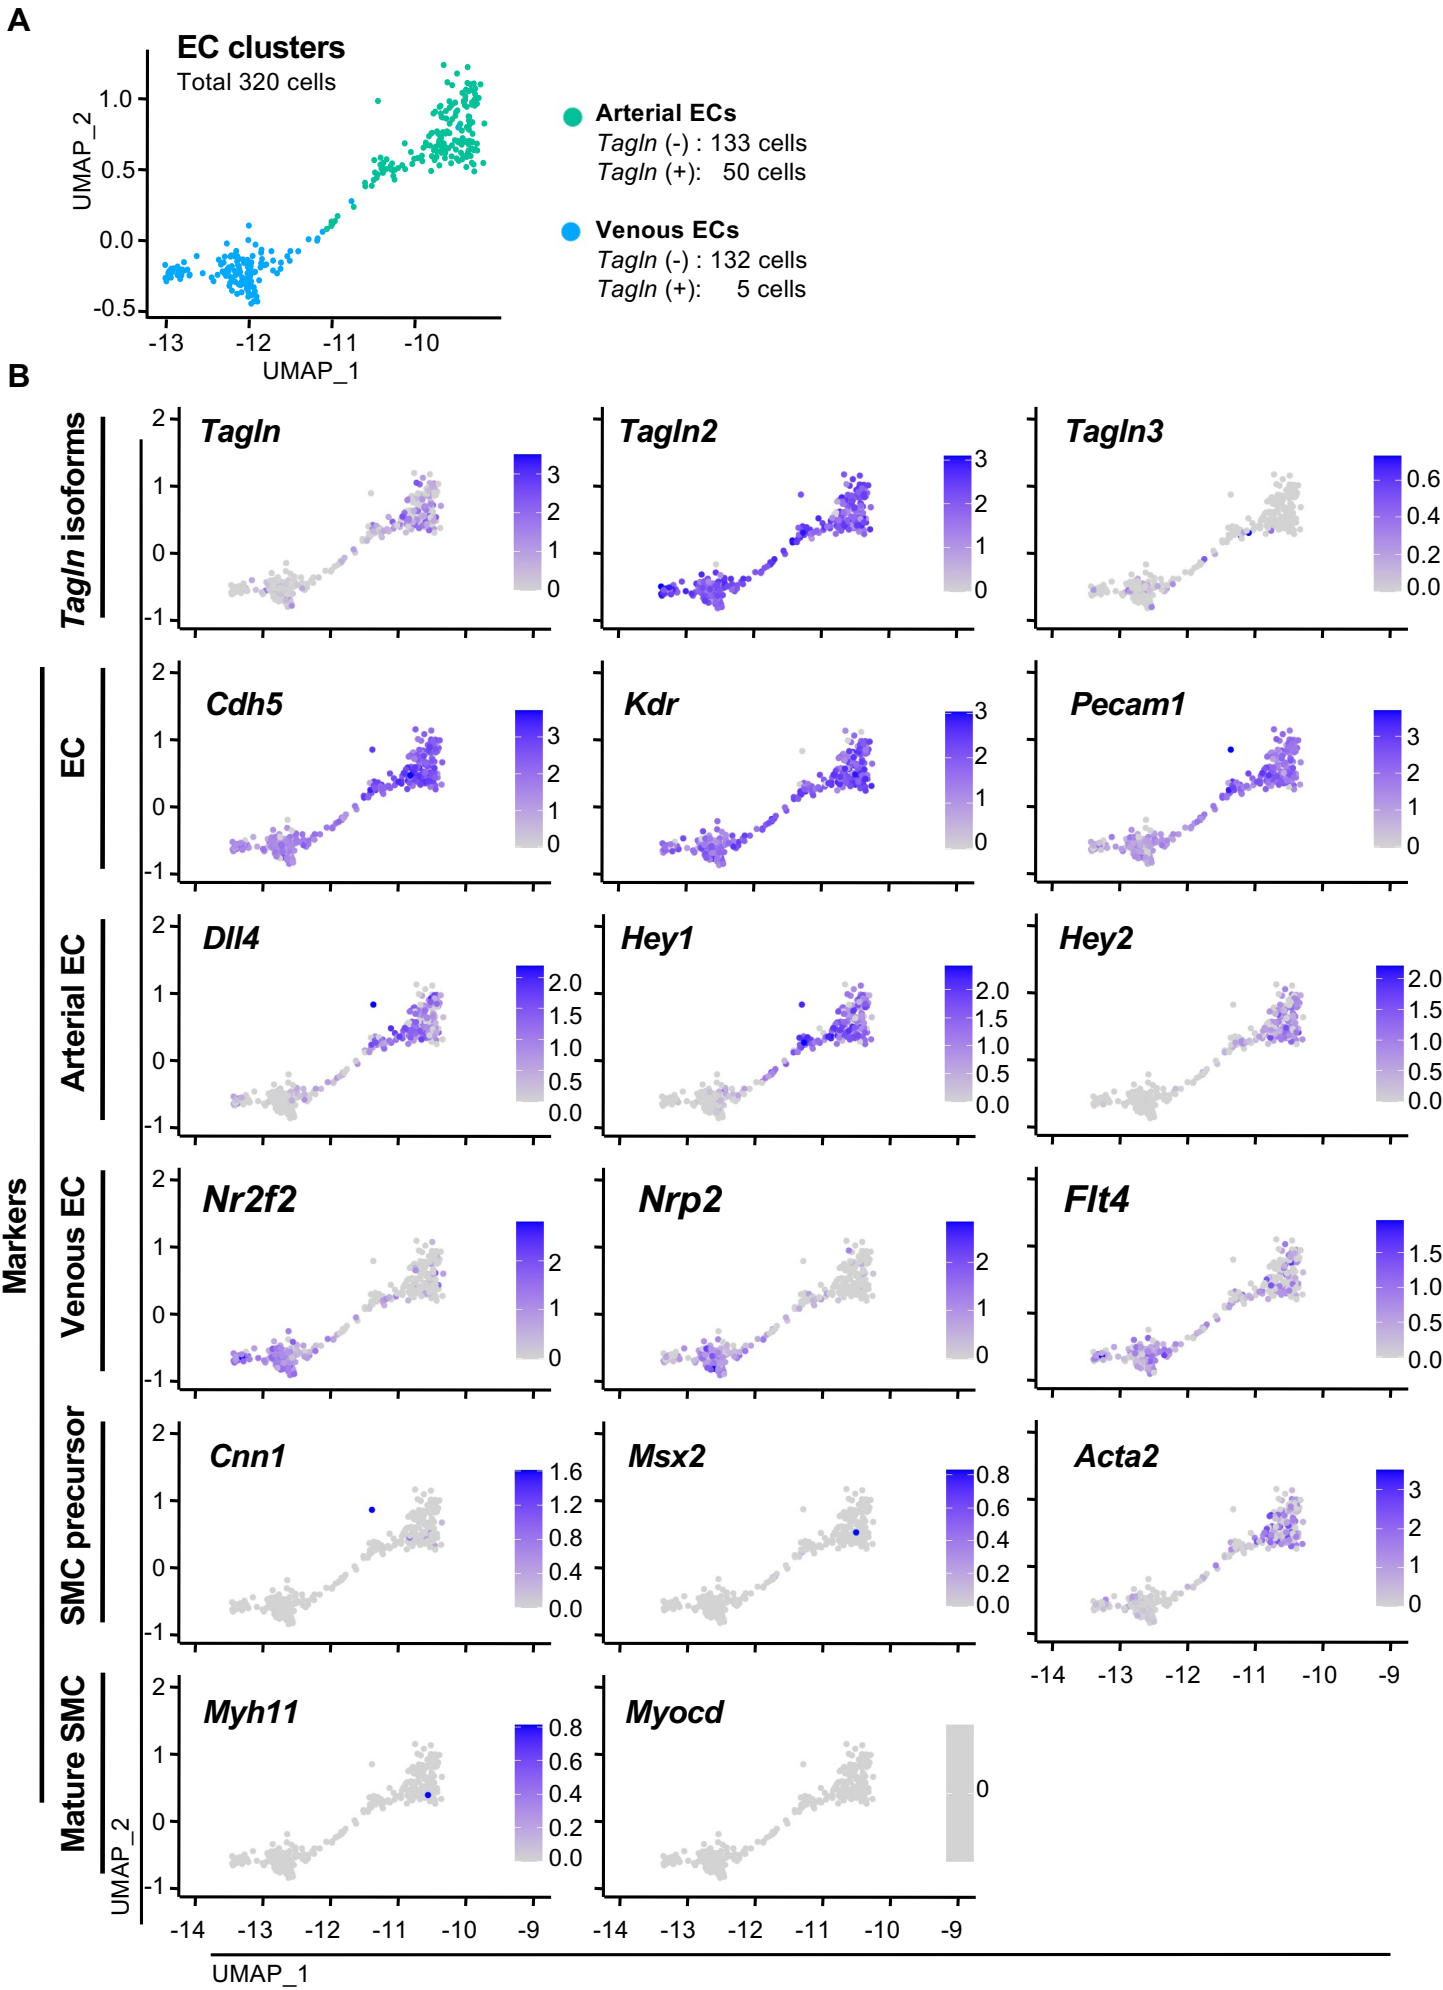

**Figure S7. *Tagln*-expressing cells are detected in the arterial and venous EC clusters**

Analysis of a single cell RNA-seq dataset of the AGM region and the FL of an E10.5 mouse embryo. (A) Arterial and venous EC clusters in the total EC cluster. The green dots show arterial ECs. The blue dots show venous ECs. (B) The feature plots show the expression of *Tagln* isoforms, and markers for EC, arterial EC, venous EC, SMC precursor and mature SMC. Canonical cell markers were based on the previous reports (Chang et al., 2012) (for a review, see (Heinke et al., 2012)).



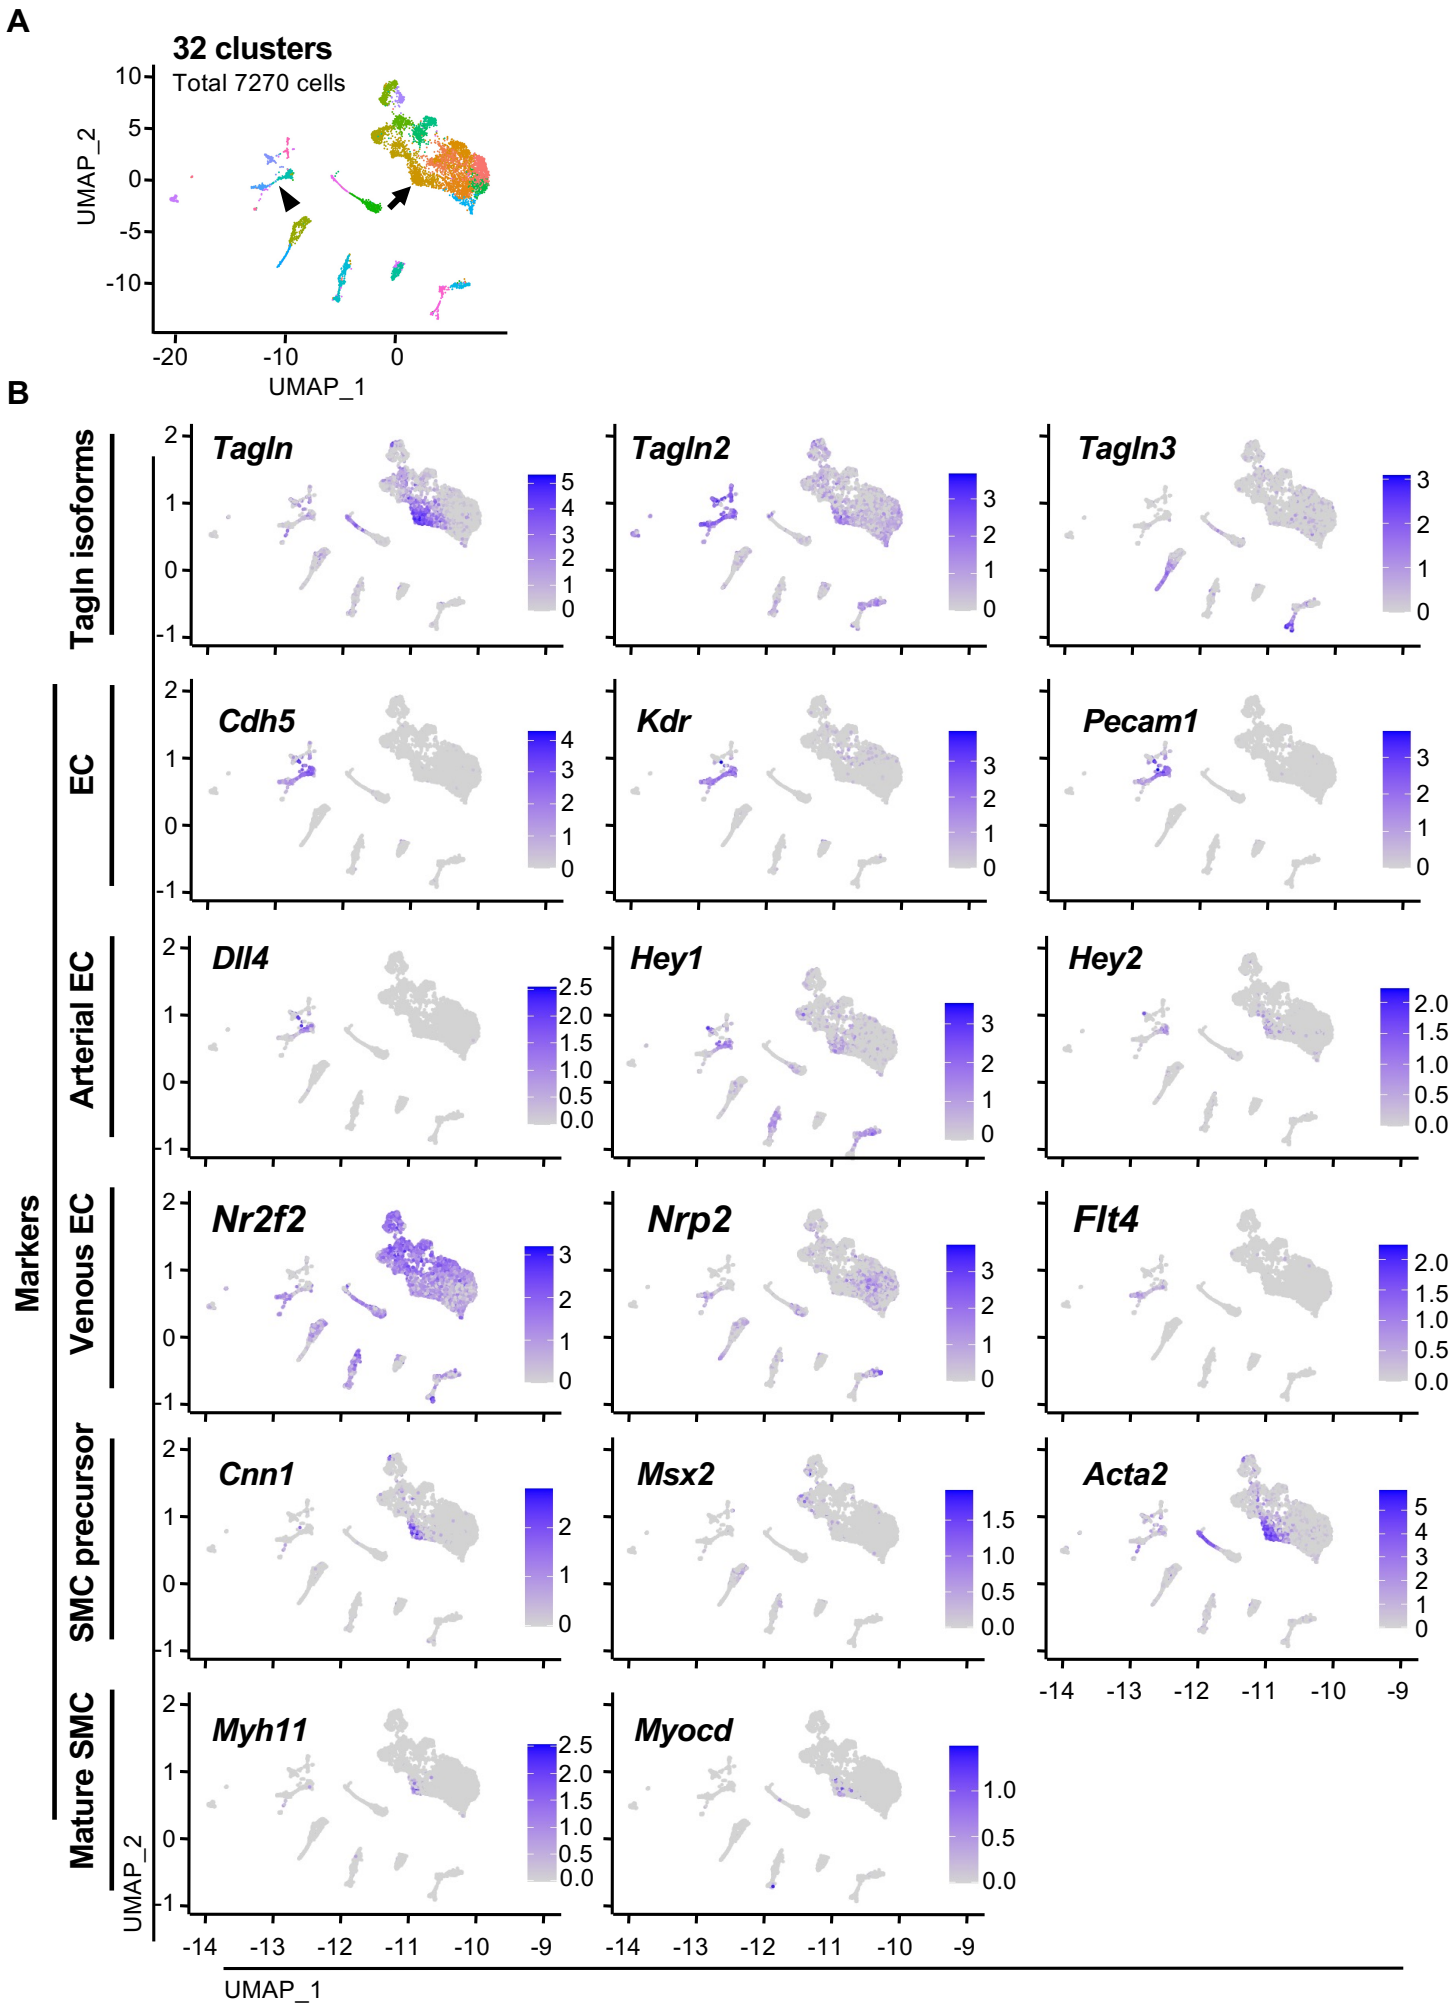

**Figure S8. *Tagln* -expressing cells are detected in both EC and SMC clusters.** Analysis of a single cell RNA-seq dataset of the AGM region and the FL of an E10.5 mouse embryo. (A) Total 32 clusters. The arrowhead points to the total EC cluster shown in Supplementary figure 7. The arrow points to the SMC cluster. (B) The feature plots show the expression of *Tagln* isoforms, and markers for EC, arterial EC, venous EC, SMC precursor and mature SMC.

**Table S1. List of genes highly expressed in *Tagln* -positive ECs in embryonic aortas**

| gene          | avg_logFC   | gene          | avg_logFC   | gene     | avg_logFC   |
|---------------|-------------|---------------|-------------|----------|-------------|
| Tagln         | 1.298254105 | Slc22a23      | 0.386482734 | Hsd17b10 | 0.34172693  |
| Acta2         | 1.252795771 | Trim27        | 0.384438805 | Pbdc1    | 0.341083816 |
| Eln           | 1.225094955 | Impdh1        | 0.379036697 | Prnd     | 0.341019554 |
| Fbln5         | 0.652144013 | Rnf215        | 0.379026475 | Khdrbs3  | 0.339911471 |
| Car4          | 0.635177264 | Phf14         | 0.377817685 | Ensa     | 0.339244925 |
| Lamc1         | 0.542729891 | Tgfb1i1       | 0.375543426 | Galnt2   | 0.339067826 |
| Reg3b         | 0.53645699  | Drap1         | 0.374364313 | Unc5b    | 0.338496426 |
| Pdlim3        | 0.490619397 | Dtx2          | 0.371840362 | Fbxl20   | 0.338239246 |
| Slc2a1        | 0.488762541 | Zc3h7a        | 0.371799869 | Cacna1a  | 0.336892608 |
| Igfbp7        | 0.472637949 | Btg2          | 0.371518371 | Pdhb     | 0.336789987 |
| Lsr           | 0.463220813 | Dnajb4        | 0.367692871 | Csrp2    | 0.335267949 |
| Myl12a        | 0.456294191 | Gata2         | 0.365689289 | Chd6     | 0.334486059 |
| Wbp1          | 0.447633409 | Poc1b         | 0.363878479 | Col4a1   | 0.332944567 |
| Hmg20a        | 0.440111165 | Dnajc3        | 0.362934149 | Pnpla2   | 0.332778986 |
| Tpm1          | 0.440099826 | Mrpl51        | 0.362207936 | Urod     | 0.332622693 |
| St3gal5       | 0.435698182 | Myadm         | 0.362163692 | Itgb1    | 0.330644585 |
| Mcts1         | 0.43517988  | Flna          | 0.361683614 | Scube1   | 0.330501609 |
| Fbln2         | 0.431716937 | S100a11       | 0.360985408 | Capn2    | 0.3298931   |
| Tm4sf1        | 0.429455732 | Frmd8         | 0.360441406 | Bptf     | 0.32870413  |
| Tie1          | 0.425069231 | Rai14         | 0.359601271 | Dcaf12l1 | 0.328407283 |
| Col3a1        | 0.424927296 | Tmem2         | 0.359134366 | Hps5     | 0.328271059 |
| Kras          | 0.423854609 | Pan3          | 0.358562311 | Igf2r    | 0.32817896  |
| Cdkn1c        | 0.422729154 | 9530068E07Rik | 0.357045698 | Acvr1    | 0.327801119 |
| Chtf8         | 0.419118954 | Phf20l1       | 0.356027931 | Kdm2b    | 0.327784046 |
| Jam3          | 0.416155381 | Slc31a1       | 0.353012216 | Rnasek   | 0.32716961  |
| Hipk3         | 0.409065587 | Yipf6         | 0.35104851  | Pja2     | 0.326442668 |
| Rtf1          | 0.400691343 | Il15          | 0.351024636 | Ajuba    | 0.325255251 |
| Mrpl4         | 0.398818005 | Gns           | 0.350236307 | Tnfaip2  | 0.325212424 |
| Ash2l         | 0.396356419 | Lsmd1         | 0.349790844 | Myo1c    | 0.323585563 |
| 8430408G22Rik | 0.396146909 | Qk            | 0.34419299  | Nfib     | 0.323081132 |
| Ist1          | 0.390825899 | Golt1b        | 0.343473095 | Rras     | 0.322059865 |
| Wdr26         | 0.387434777 | Riok2         | 0.342806516 |          |             |

**Table S2. List of gene ontology (OG) associated with genes in Supplementary table 1**

| GO biological process complete                                        | Fold Enrichment | raw P-value | FDR      |
|-----------------------------------------------------------------------|-----------------|-------------|----------|
| angiogenesis (GO:0001525)                                             | 7.06            | 0.0000065   | 0.020500 |
| blood vessel morphogenesis (GO:0048514)                               | 5.74            | 0.0000114   | 0.022400 |
| tube morphogenesis (GO:0035239)                                       | 4.42            | 0.0000083   | 0.018800 |
| head development (GO:0060322)                                         | 4.37            | 0.0000214   | 0.037500 |
| tube development (GO:0035295)                                         | 4.21            | 0.0000012   | 0.019300 |
| anatomical structure formation involved in morphogenesis (GO:0048646) | 3.97            | 0.0000056   | 0.029700 |
| anatomical structure morphogenesis (GO:0009653)                       | 2.66            | 0.0000069   | 0.018200 |
| cellular component organization (GO:0016043)                          | 1.94            | 0.0000051   | 0.040100 |
| cellular component organization or biogenesis (GO:0071840)            | 1.92            | 0.0000062   | 0.024300 |

**Table S3. List of genes highly expressed in *Tagln*-positive ECs from AGM and FL**  
The asterisks are the genes shown in supplementary table 1.

|   | gene    | avg_logFC  | gene     | avg_logFC  |
|---|---------|------------|----------|------------|
| * | Tagln   | 2.20949927 | Fchsd2   | 0.40561415 |
| * | Acta2   | 1.7442024  | Klf4     | 0.40494123 |
|   | Actc1   | 1.06343492 | Mmp2     | 0.39937238 |
| * | Tpm1    | 0.91730392 | Adgrg6   | 0.3928397  |
|   | Myl9    | 0.88662588 | Col5a2   | 0.3788074  |
| * | Btg2    | 0.61183573 | Vwf      | 0.36763662 |
|   | Lgals1  | 0.52584705 | Slit2    | 0.36753451 |
|   | Prdx4   | 0.52543552 | Vps4a    | 0.3669577  |
|   | Tmem100 | 0.515779   | Pmp22    | 0.35555139 |
|   | Txnip   | 0.51104832 | Clu      | 0.35219103 |
|   | Spon2   | 0.47752857 | AU021092 | 0.34454944 |
|   | Sptlc2  | 0.46808485 | Ptn      | 0.34017416 |
|   | Fn1     | 0.44640552 | Nrp1     | 0.34008331 |
|   | Loxl2   | 0.44529066 | Htra1    | 0.33946908 |
|   | Klf2    | 0.44072027 | Col26a1  | 0.33411637 |
| * | S100a11 | 0.44052715 | Smpdl3a  | 0.33351794 |
|   | Fbn1    | 0.42912497 | Tmem120a | 0.33328635 |
|   | Cnd2    | 0.42771652 | Gjc1     | 0.3307873  |
|   | Cd63    | 0.42633846 | Alox12   | 0.32942225 |

**Table S4. List of OG associated with genes in Supplementary table 3** The asterisks are the GO terms shown in Supplementary table 2.

| GO biological process complete                                               | Fold Enrichment | raw P-value | FDR     |
|------------------------------------------------------------------------------|-----------------|-------------|---------|
| AV node cell to bundle of His cell communication by electrical coupling      | > 100           | 0.0000320   | 0.01230 |
| cell communication by electrical coupling involved in cardiac conduction     | > 100           | 0.0000480   | 0.01760 |
| regulation of retinal ganglion cell axon guidance                            | > 100           | 0.0000671   | 0.02200 |
| cellular response to laminar fluid shear stress                              | > 100           | 0.0000894   | 0.02710 |
| neural crest cell migration involved in autonomic nervous system development | > 100           | 0.0001150   | 0.03060 |
| gap junction assembly                                                        | > 100           | 0.0001150   | 0.03010 |
| response to laminar fluid shear stress                                       | > 100           | 0.0001150   | 0.02960 |
| neuron projection extension involved in neuron projection guidance           | > 100           | 0.0001430   | 0.03530 |
| axon extension involved in axon guidance                                     | > 100           | 0.0001430   | 0.03470 |
| cell communication by electrical coupling                                    | > 100           | 0.0001430   | 0.03420 |
| actin-myosin filament sliding                                                | > 100           | 0.0001750   | 0.03880 |
| dendrite arborization                                                        | > 100           | 0.0002100   | 0.04400 |
| AV node cell to bundle of His cell communication                             | 99.95           | 0.0002480   | 0.04810 |
| positive regulation of nitric oxide biosynthetic process                     | 35.09           | 0.0001020   | 0.02880 |
| positive regulation of nitric oxide metabolic process                        | 34.36           | 0.0001090   | 0.03000 |
| * sprouting angiogenesis                                                     | 28.43           | 0.0001860   | 0.04060 |
| positive regulation of reactive oxygen species biosynthetic process          | 26.6            | 0.0002240   | 0.04580 |
| endothelial cell migration                                                   | 25.37           | 0.0002560   | 0.04860 |
| positive regulation of cell-substrate adhesion                               | 16.53           | 0.0001100   | 0.02990 |
| cardiac chamber morphogenesis                                                | 15.59           | 0.0001370   | 0.03420 |
| positive regulation of chemotaxis                                            | 15.06           | 0.0001560   | 0.03610 |
| ameboidal-type cell migration                                                | 14.47           | 0.0000264   | 0.01120 |
| mesenchymal cell differentiation                                             | 13.92           | 0.0002100   | 0.04460 |
| negative regulation of neuron projection development                         | 13.49           | 0.0002350   | 0.04630 |
| regulation of endothelial cell migration                                     | 13.01           | 0.0002690   | 0.04990 |
| heart morphogenesis                                                          | 12.45           | 0.0000089   | 0.00517 |
| regulation of cell-substrate adhesion                                        | 12.44           | 0.0000534   | 0.01870 |
| extracellular matrix organization                                            | 12.31           | 0.0000094   | 0.00531 |
| external encapsulating structure organization                                | 12.26           | 0.0000096   | 0.00523 |
| extracellular structure organization                                         | 12.26           | 0.0000096   | 0.00506 |
| regulation of epithelial cell migration                                      | 11.55           | 0.0000753   | 0.02370 |
| * angiogenesis                                                               | 10.15           | 0.0000274   | 0.01110 |
| negative regulation of locomotion                                            | 9.96            | 0.0000304   | 0.01190 |
| heart development                                                            | 9.73            | 0.0000001   | 0.00013 |
| negative regulation of cell migration                                        | 9.71            | 0.0001670   | 0.03810 |
| negative regulation of cell motility                                         | 9.29            | 0.0002050   | 0.04420 |
| negative regulation of cellular component movement                           | 9.01            | 0.0002350   | 0.04680 |
| * blood vessel morphogenesis                                                 | 8.77            | 0.0000139   | 0.00685 |
| positive regulation of cell adhesion                                         | 8.73            | 0.0000143   | 0.00684 |
| blood circulation                                                            | 8.01            | 0.0001000   | 0.02920 |
| regulation of anatomical structure size                                      | 7.72            | 0.0000079   | 0.00494 |
| regulation of cell adhesion                                                  | 7.5             | 0.0000006   | 0.00064 |
| circulatory system process                                                   | 7.45            | 0.0001480   | 0.03480 |



|   |                                                          |      |           |         |
|---|----------------------------------------------------------|------|-----------|---------|
| * | blood vessel development                                 | 7.11 | 0.0000519 | 0.01860 |
|   | regulation of neuron projection development              | 7.05 | 0.0000549 | 0.01880 |
| * | vasculature development                                  | 6.74 | 0.0000726 | 0.02330 |
|   | circulatory system development                           | 6.55 | 0.0000006 | 0.00063 |
|   | positive regulation of locomotion                        | 6.39 | 0.0001010 | 0.02880 |
|   | tissue morphogenesis                                     | 6.16 | 0.0001270 | 0.03220 |
|   | negative regulation of multicellular organismal process  | 6.07 | 0.0000003 | 0.00045 |
|   | tissue development                                       | 5.91 | 0.0000000 | 0.00000 |
|   | cell adhesion                                            | 5.85 | 0.0000177 | 0.00821 |
|   | regulation of cell migration                             | 5.85 | 0.0000055 | 0.00378 |
|   | biological adhesion                                      | 5.78 | 0.0000194 | 0.00851 |
|   | regulation of cell motility                              | 5.55 | 0.0000087 | 0.00526 |
|   | regulation of response to external stimulus              | 5.54 | 0.0000271 | 0.01120 |
|   | regulation of locomotion                                 | 5.3  | 0.0000131 | 0.00664 |
| * | anatomical structure formation involved in morphogenesis | 5.22 | 0.0000427 | 0.01600 |
|   | regulation of cellular component movement                | 5.11 | 0.0000178 | 0.00801 |
|   | cell migration                                           | 4.97 | 0.0001700 | 0.03820 |
|   | regulation of apoptotic process                          | 4.87 | 0.0000012 | 0.00103 |
|   | animal organ morphogenesis                               | 4.81 | 0.0000807 | 0.02490 |
|   | negative regulation of apoptotic process                 | 4.77 | 0.0002240 | 0.04530 |
|   | regulation of programmed cell death                      | 4.75 | 0.0000015 | 0.00122 |
|   | epithelium development                                   | 4.73 | 0.0000914 | 0.02720 |
|   | negative regulation of programmed cell death             | 4.67 | 0.0002610 | 0.04900 |
|   | regulation of cell population proliferation              | 4.55 | 0.0000009 | 0.00088 |
|   | animal organ development                                 | 4.37 | 0.0000000 | 0.00000 |
|   | regulation of cell death                                 | 4.29 | 0.0000048 | 0.00360 |
| * | anatomical structure morphogenesis                       | 4.13 | 0.0000001 | 0.00023 |
|   | movement of cell or subcellular component                | 3.78 | 0.0002190 | 0.04550 |
|   | cell development                                         | 3.64 | 0.0000617 | 0.02070 |
|   | regulation of multicellular organismal process           | 3.55 | 0.0000005 | 0.00062 |
|   | system development                                       | 3.29 | 0.0000000 | 0.00001 |
|   | cell differentiation                                     | 3.24 | 0.0000001 | 0.00025 |
|   | cellular developmental process                           | 3.2  | 0.0000002 | 0.00026 |
|   | multicellular organism development                       | 2.99 | 0.0000000 | 0.00001 |
|   | anatomical structure development                         | 2.98 | 0.0000000 | 0.00000 |
|   | developmental process                                    | 2.87 | 0.0000000 | 0.00000 |
|   | negative regulation of cellular process                  | 2.62 | 0.0000012 | 0.00107 |
|   | negative regulation of biological process                | 2.4  | 0.0000058 | 0.00382 |
|   | positive regulation of cellular process                  | 2.33 | 0.0000052 | 0.00375 |
|   | positive regulation of biological process                | 2.32 | 0.0000013 | 0.00108 |
|   | multicellular organismal process                         | 2.25 | 0.0000001 | 0.00017 |
| * | cellular component organization                          | 2.13 | 0.0002540 | 0.04880 |
